# Supplementary material for: The morphogenic protein CopD controls the spatio-temporal dynamics of PBP1a and PBP2b in Streptococcus pneumoniae
Source: PubMed Central journal article supplement (PMC10653890; doi:10.1128/mbio.01411-23), 2023-09-20
Supplement: mbio.01411-23-s0001.pdf [file mbio.01411-23-s0001.pdf]

## SUPPLEMENTAL MATERIAL

### **The morphogenic protein CopD controls the spatio-temporal dynamics of PBP1a and PBP2b in *Streptococcus pneumoniae***

Cassandra Lenoir<sup>1</sup>, Anaïs Pelletier<sup>1</sup>, Sylvie Manuse<sup>1</sup>, Hugo Millat<sup>1</sup>, Adrien Ducret<sup>1</sup>, Anne Galinier<sup>2</sup>, Thierry Doan<sup>3</sup> and Christophe Grangeasse<sup>1, #</sup>

<sup>1</sup> Molecular Microbiology and Structural Biochemistry, UMR 5086, Université de Lyon, CNRS, Lyon, France

<sup>2</sup> Laboratoire de Biochimie Bactérienne, UMR 7283, Aix-Marseille Université, CNRS, Marseille, France.

<sup>3</sup> Laboratoire d'Ingénierie des Systèmes Macromoléculaires, UMR 7255, Aix-Marseille Université, Marseille, France.

Anaïs Pelletier and Cassandra Lenoir contributed equally to this work and are co-first authors.

# Correspondence should be addressed to Christophe Grangeasse  
[christophe.grangeasse@ibcp.fr](mailto:christophe.grangeasse@ibcp.fr)

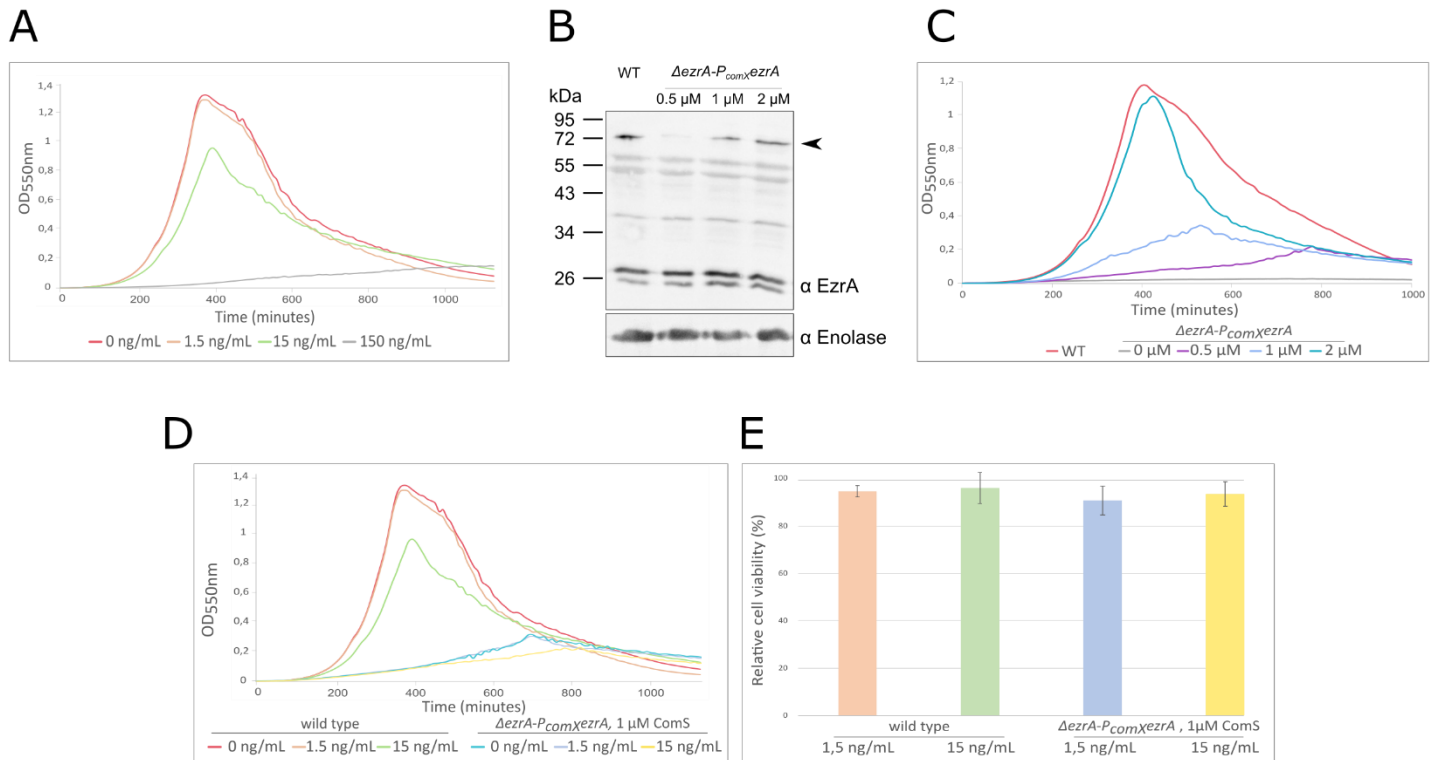

**Figure S1: Effect of tetracycline and/or *ezrA*-depletion on cell growth and viability. (A)**

WT cells were grown in C+Y medium at 37°C in the presence of increasing concentration of tetracycline. The OD<sub>550</sub> was read automatically every 10 min. **(B)** Western immunoblot of whole-cell lysates from  $\Delta ezrA$ - $P_{comX}$ -*ezrA* cells, grown to exponential phase in the presence (0.5, 1 or 2  $\mu$ M) of the ComS inducer, were probed with specific anti-EzrA ( $\alpha$  EzrA) antibody. To estimate the relative quantity of proteins in crude extract and to compare the different lanes, we used enolase (Spr1036) as an internal standard. The enolase was detected using specific antibodies ( $\alpha$  Enolase) and is presented in the lower part of the Figure. EzrA is indicated with a black arrow. **(C)**  $\Delta ezrA$ - $P_{comX}$ -*ezrA* cells were grown in C+Y medium at 37°C in the absence or presence of decreasing concentration of ComS from 2 to 0  $\mu$ M. The OD<sub>550</sub> was read automatically every 10 min. **(D)** Growth curves of WT and  $\Delta ezrA$ - $P_{comX}$ -*ezrA* strains (+ 1  $\mu$ M ComS) in presence of 1.5 ng/ml or 15 ng/ml of tetracycline. **(E)** Relative cell viability of  $\Delta ezrA$ - $P_{comX}$ -*ezrA* (+ 1  $\mu$ M ComS) compared to WT cells in the presence of 1.5 ng/ml or 15 ng/ml of tetracycline. Bar chart represents the mean  $\pm$  SEM.

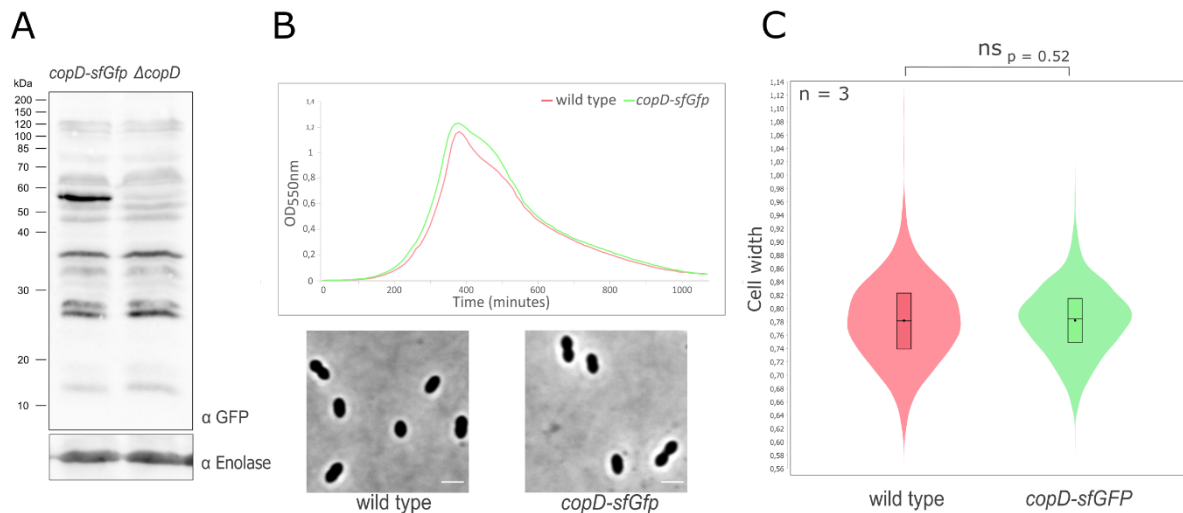

**Figure S2: Expression and functionality of the CopD-sfGFP fusion.** (A) The Western immunoblot was probed with specific anti-GFP antibodies ( $\alpha$  GFP) to determine *copD* expression in *copD-sfGfp* cells. To estimate the relative quantity of proteins in crude extract and to compare the different lanes, we used enolase (Spr1036) as an internal standard. The enolase was detected using specific antibodies ( $\alpha$  Enolase) and is presented in the lower part of the Figure. (B) Growth of WT and *copD-sfGfp* strains. Strains were grown in C+Y medium at 37°C in a spectrophotometer. The OD<sub>550</sub> was read automatically every 10 min. Representative phase contrast microscopy images of WT and *copD-sfGfp* cells are shown below the growth curves. Scale bar, 2  $\mu$ m. (C) Corresponding violin plot show the distribution of the cell width as determined using MicrobeJ (56). The distribution of the cell width is shown in red for the WT strain and in green for the *copD-sfGfp* strain. The box indicates the 25th to the 75th percentile, and the whiskers indicate the minimum and the maximum values. The mean and the median are indicated with a dot and a line in the box, respectively. Statistical comparison was done using t-test. n=3 indicates the number of independent experiments with a total of 8000 cells analyzed.

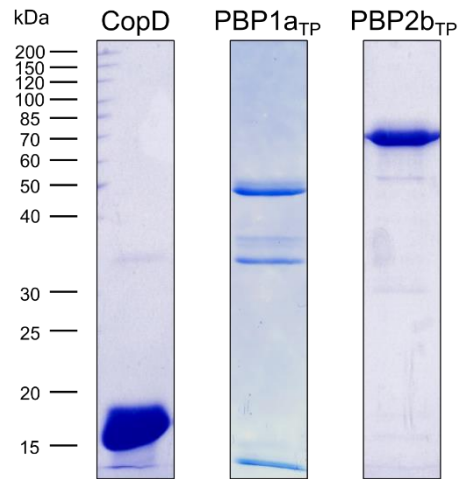

**Figure S3: Purification of CopD<sub>ED</sub>, PBP1A<sub>TP</sub> and PBP2b<sub>TP</sub>.** Proteins were overproduced in *E. coli* BL21 as 6his-tagged fusion proteins. After purification using a Ni-NTA resin, purified proteins were analyzed by SDS-PAGE.

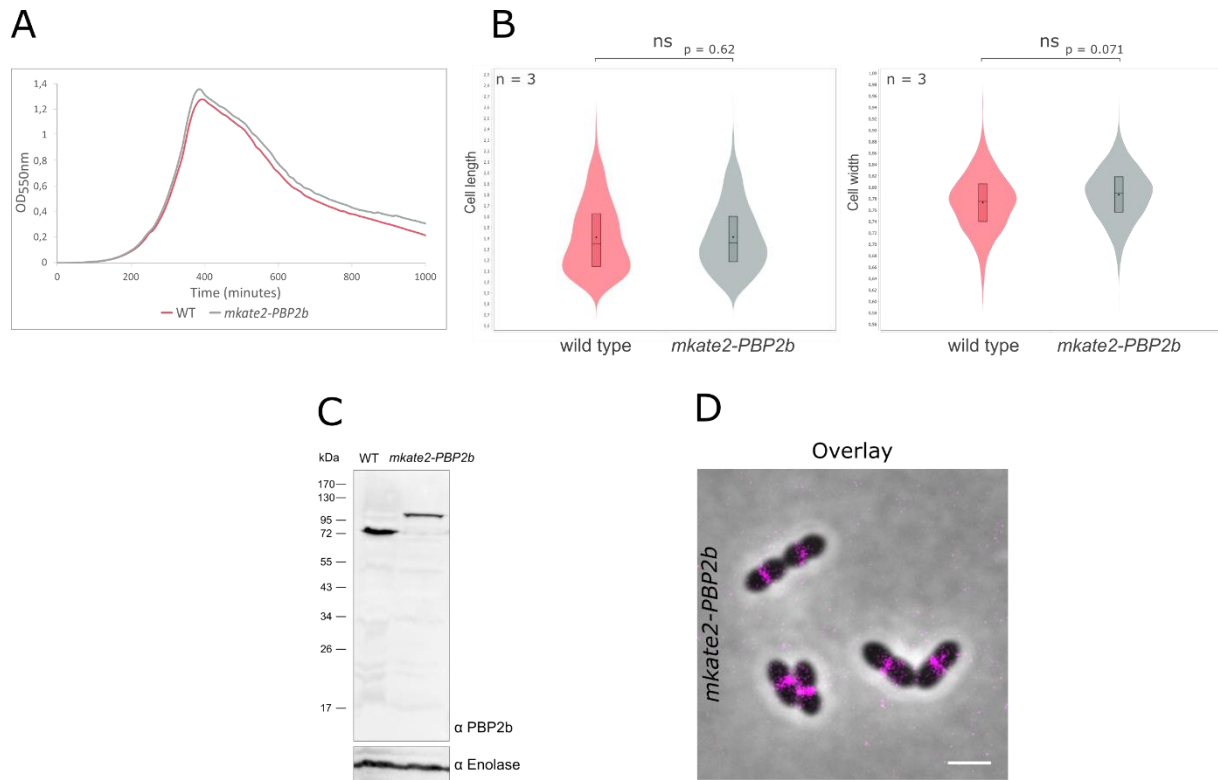

**Figure S4: Validation of the *mkate2-PBP2b* fusion.** (A) Growth curves of WT and *mkate2-PBP2b* cells in C+Y medium at 37°C. The OD<sub>550</sub> was read automatically every 10 min. (B) Violin plot showing the distribution of the cell length (left panel) and cell width (right panel) for WT (red) and *mkate2-PBP2b* (grey) strains as determined using MicrobeJ (56). The box indicates the 25th to the 75th percentile, and the whiskers indicate the minimum and the maximum values. The mean and the median are indicated with a dot and a line in the box, respectively. Statistical comparison was done using t-test. n=3 indicates the number of independent experiments with a total of 10 000 cells analyzed. (C) Expression of *mkate2-PBP2b*. *mkate2-PBP2b* represents the only source of PBP2b from its endogenous chromosomal locus. After SDS-PAGE and electro-blotting, the membrane was probed with anti-PBP2b antibody. As control, WT cells were also analyzed. (D) Overlays between phase-contrast and mKate2 images of *mkate2-PBP2b* cells. Scale bar, 2 μm.

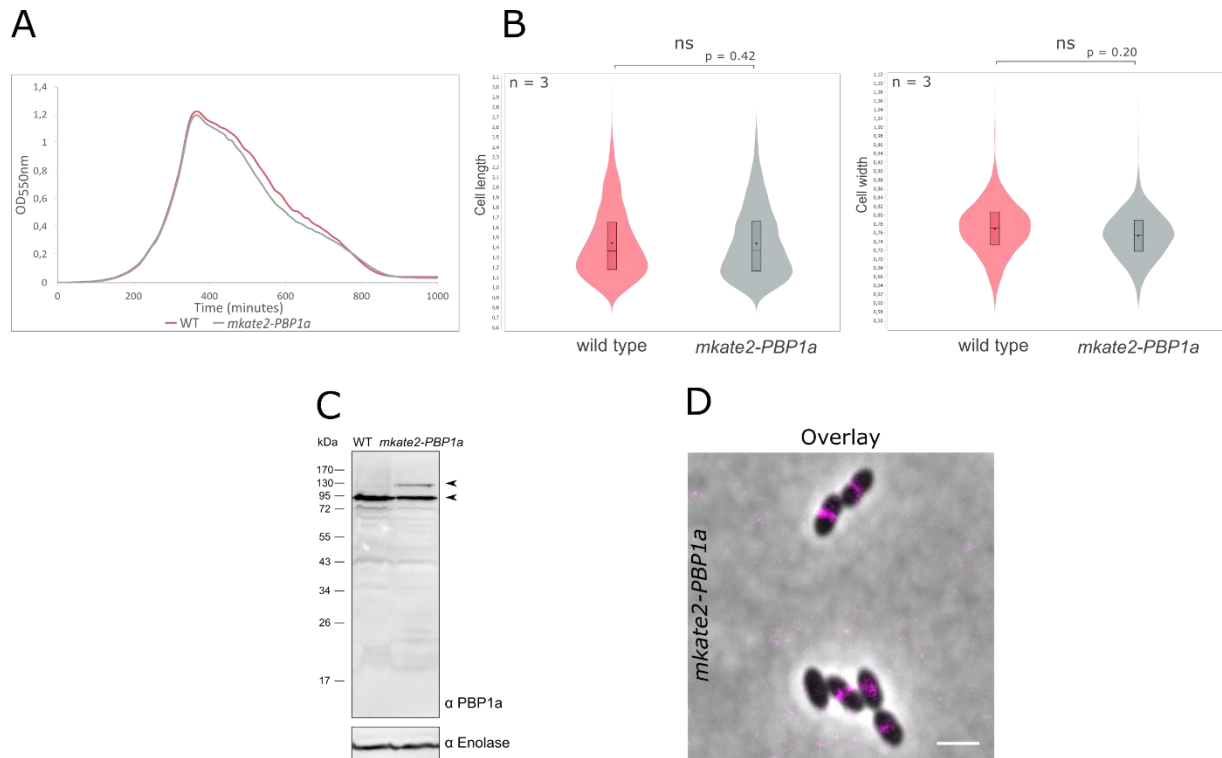

**Figure S5: Validation of the *mkate2-PBP1a* fusion.** (A) Growth curves of WT and  $P_{Zn}$ -*mkate2-PBP1a* cells in C+Y medium at 37°C. The OD<sub>550</sub> was read automatically every 10 min. (B) Violin plot showing the distribution of the cell length (left panel) and cell width (right panel) for WT (red) and *mkate2-PBP1a* (grey) strains as determined using MicrobeJ (56). The box indicates the 25th to the 75th percentile, and the whiskers indicate the minimum and the maximum values. The mean and the median are indicated with a dot and a line in the box, respectively. Statistical comparison was done using t-test. n=3 indicates the number of independent experiments with a total of 10 000 cells analyzed. (C) Expression of *mkate2-PBP1a*. The merodiploid strain  $P_{Zn}$ -*mkate2-PBP1a* expresses the chromosomal *PBP1a* and the ectopic *mkate2-PBP1a* fusion under the control of the zinc-inducible  $P_{Zn}$  promoter. The two forms are indicated by arrows. After SDS-PAGE and electro-blotting, the membrane was probed with anti-PBP1a antibody. As control, WT cells were also analyzed. (D) Overlays between phase-contrast and *mkate2* images of  $P_{Zn}$ -*mkate2-PBP1a* cells. Scale bar, 2  $\mu$ m.

**Table S1 - Strains and plasmids used in this study**

| Strain                                                                   | Genotype and description                                                                                                                                                              | Reference                                  | Primers (Table S2)     |
|--------------------------------------------------------------------------|---------------------------------------------------------------------------------------------------------------------------------------------------------------------------------------|--------------------------------------------|------------------------|
| <i>S. pneumoniae</i> strains                                             |                                                                                                                                                                                       |                                            |                        |
| R800                                                                     | <i>S. pneumoniae</i> R6 derivative                                                                                                                                                    | Gift from J.-P. Claverys, Toulouse, France |                        |
| Wild type                                                                | R800 <i>rpsL1</i>                                                                                                                                                                     | Gift from J.-P. Claverys, Toulouse, France |                        |
| <i>copD</i> :: <i>Janus</i>                                              | R800 <i>rpsL1</i> , <i>copD</i> :: <i>kan-rpsL</i> ; <i>Kan</i> <sup>R</sup>                                                                                                          | This study                                 | 1, 2, 3, 4, 5, 6       |
| $\Delta$ <i>copD</i>                                                     | R800 <i>rpsL1</i> , $\Delta$ <i>copD</i> ; <i>Str</i> <sup>R</sup>                                                                                                                    | This study                                 | 1, 2, 7, 8             |
| <i>copD</i> - $\Delta$ PepSY                                             | R800 <i>rpsL1</i> , <i>copD</i> - $\Delta$ PepSY(A57-L162); <i>Str</i> <sup>R</sup>                                                                                                   | This study                                 | 1, 2, 9, 10            |
| <i>copD</i> -sfGfp                                                       | R800 <i>rpsL1</i> , <i>copD</i> -sfGfp; <i>Str</i> <sup>R</sup>                                                                                                                       | This study                                 | 1, 2, 10, 11, 12, 13   |
| <i>P</i> <sub>comX</sub> - <i>copD</i>                                   | R800 <i>rpsL1</i> , $\Delta$ IS1167::P1::P <sub>comR</sub> - <i>comR</i> , <i>cpsN-O</i> ::P <sub>comX</sub> - <i>copD</i> ; <i>Str</i> <sup>R</sup>                                  | This study                                 | 14, 15, 16, 17, 18, 19 |
| <i>copD</i> :: <i>Janus</i> - <i>P</i> <sub>comX</sub> - <i>copD</i>     | R800 <i>rpsL1</i> , $\Delta$ IS1167::P1::P <sub>comR</sub> - <i>comR</i> , <i>cpsN-O</i> ::P <sub>comX</sub> - <i>copD</i> , <i>copD</i> :: <i>kan-rpsL</i> ; <i>Kan</i> <sup>R</sup> | This study                                 | 1, 2                   |
| $\Delta$ <i>copD</i> - <i>P</i> <sub>comX</sub> - <i>copD</i> ,          | R800 <i>rpsL1</i> , $\Delta$ IS1167::P1::P <sub>comR</sub> - <i>comR</i> , <i>cpsN-O</i> ::P <sub>comX</sub> - <i>copD</i> , $\Delta$ <i>copD</i> ; <i>Str</i> <sup>R</sup>           | This study                                 | 1, 2                   |
| <i>P</i> <sub>comX</sub> -sfGfp                                          | R800 <i>rpsL1</i> , $\Delta$ IS1167::P1::P <sub>comR</sub> - <i>comR</i> , <i>cpsN-O</i> ::P <sub>comX</sub> -sfGfp; <i>Str</i> <sup>R</sup>                                          | This study                                 | 14, 15, 16, 17, 20, 21 |
| <i>gfp</i> -PBP2b                                                        | R800 <i>rpsL1</i> , <i>gfp</i> -PBP2b; <i>Str</i> <sup>R</sup>                                                                                                                        | This study                                 | 22, 23, 24, 25, 26     |
| <i>copD</i> :: <i>Janus</i> - <i>gfp</i> -PBP2b                          | R800 <i>rpsL1</i> , <i>gfp</i> -PBP2b, <i>copD</i> :: <i>kan-rpsL</i> ; <i>Kan</i> <sup>R</sup>                                                                                       | This study                                 | 1, 2                   |
| $\Delta$ <i>copD</i> - <i>gfp</i> -PBP2b                                 | R800 <i>rpsL1</i> , <i>gfp</i> -PBP2b, $\Delta$ <i>copD</i> ; <i>Str</i> <sup>R</sup>                                                                                                 | This study                                 | 1, 2                   |
| <i>P</i> <sub>Zn</sub> - <i>gfp</i> -PBP1a                               | R800 <i>rpsL1</i> , <i>bgaA</i> ::P <sub>Zn</sub> - <i>gfp</i> -PBP1a; <i>Str</i> <sup>R</sup> <i>Tet</i> <sup>R</sup>                                                                | Gift from C. Morlot                        |                        |
| <i>copD</i> :: <i>Janus</i> - <i>P</i> <sub>Zn</sub> - <i>gfp</i> -PBP1a | R800 <i>rpsL1</i> , <i>bgaA</i> ::P <sub>Zn</sub> - <i>gfp</i> -PBP1a, <i>copD</i> :: <i>kan-rpsL</i> ; <i>Kan</i> <sup>R</sup> <i>Tet</i> <sup>R</sup>                               | This study                                 | 1, 2                   |
| $\Delta$ <i>copD</i> - <i>P</i> <sub>Zn</sub> - <i>gfp</i> -PBP1a        | R800 <i>rpsL1</i> , <i>bgaA</i> ::P <sub>Zn</sub> - <i>gfp</i> -PBP1a, $\Delta$ <i>copD</i> ; <i>Str</i> <sup>R</sup> <i>Tet</i> <sup>R</sup>                                         | This study                                 | 1, 2                   |
| <i>copD</i> :: <i>Janus</i> - <i>gfp</i> -PBP2b                          | R800 <i>rpsL1</i> , <i>gfp</i> -PBP2b, <i>copD</i> :: <i>kan-rpsL</i> ; <i>Kan</i> <sup>R</sup>                                                                                       | This study                                 | 1, 2                   |
| <i>gfp</i> -ftsA                                                         | R800 <i>rpsL1</i> , <i>gfp</i> -ftsA; <i>Str</i> <sup>R</sup>                                                                                                                         | 1                                          |                        |
| <i>copD</i> -sfGfp- <i>gfp</i> -PBP2b                                    | R800 <i>rpsL1</i> , <i>gfp</i> -PBP2b, <i>copD</i> -sfGfp; <i>Str</i> <sup>R</sup>                                                                                                    | This study                                 | 1, 2                   |
| <i>P</i> <sub>Zn</sub> -mkate2-PBP1a                                     | R800 <i>rpsL1</i> , <i>P</i> <sub>Zn</sub> -mkate2-PBP1a, <i>Str</i> <sup>R</sup> <i>Tet</i> <sup>R</sup>                                                                             | Gift from C. Morlot                        |                        |
| <i>copD</i> :: <i>Janus</i> - <i>P</i> <sub>Zn</sub> -mkate2-PBP1a       | R800 <i>rpsL1</i> , <i>P</i> <sub>Zn</sub> -mkate2-PBP1a, <i>copD</i> :: <i>kan-rpsL</i> , <i>Kan</i> <sup>R</sup> <i>Tet</i> <sup>R</sup>                                            | This study                                 | 1, 2                   |
| <i>copD</i> -sfgfp- <i>P</i> <sub>Zn</sub> -mkate2-PBP1a                 | R800 <i>rpsL1</i> , <i>P</i> <sub>Zn</sub> -mkate2-PBP1a, <i>copD</i> -sfgfp, <i>Str</i> <sup>R</sup> <i>Tet</i> <sup>R</sup>                                                         | This study                                 | 1, 2                   |

|                                         |                                                                                                                                                                                                       |            |                        |
|-----------------------------------------|-------------------------------------------------------------------------------------------------------------------------------------------------------------------------------------------------------|------------|------------------------|
| <i>mkate2-PBP2b</i>                     | <i>R800 rpsL1, mkate2-PBP2b, Str<sup>R</sup></i>                                                                                                                                                      | This study | 22, 23, 25, 27, 28     |
| <i>copD::Janus-mkate2-PBP2b</i>         | <i>R800 rpsL1, mkate2-PBP2b, copD::kan-rpsI, Kan<sup>R</sup></i>                                                                                                                                      | This study | 1, 2                   |
| <i>copD-sfGfp-mkate2-PBP2b</i>          | <i>R800 rpsL1, mkate2-PBP2b, copD-sfGfp, Str<sup>R</sup></i>                                                                                                                                          | This study | 1, 2                   |
| <i>P<sub>comX</sub>-ezrA</i>            | <i>R800 rpsL1, ΔIS1167::P1::P<sub>comR</sub>-comR, cpsN-O::P<sub>comX</sub>-ezrA, Str<sup>R</sup></i>                                                                                                 | This study | 14, 15, 16, 17, 29, 30 |
| <i>ezrA-Janus</i>                       | <i>R800 rpsL1, ezrA-kan-rpsI; Kan<sup>R</sup></i>                                                                                                                                                     | This study | 3, 4, 31, 32, 33, 34   |
| <i>ezrA-Janus-P<sub>comX</sub>-ezrA</i> | <i>R800 rpsL1, ΔIS1167::P1::P<sub>comR</sub>-comR, cpsN-O::P<sub>comX</sub>-ezrA, ezrA-kan-rpsI; Kan<sup>R</sup></i>                                                                                  | This study | 31, 32                 |
| <i>ΔezrA-P<sub>comX</sub>-ezrA</i>      | <i>R800 rpsL1, ΔIS1167::P1::P<sub>comR</sub>-comR, cpsN-O::P<sub>comX</sub>-ezrA, ΔezrA; Str<sup>R</sup></i>                                                                                          | This study | 31, 32, 35, 36         |
| <b><i>E. coli</i> strains</b>           |                                                                                                                                                                                                       |            |                        |
| <i>XL1-Blue</i>                         | <i>supE44 hsdR17 recA1 endA1 gyrA46 thi relA1 lac-F'[proAB + lac<sup>I</sup>lacZΔM15 Tn10 (Tc<sup>R</sup>)]</i>                                                                                       | 2          |                        |
| <i>BTH101</i>                           | <i>F-, cya-99, araD139, galE15, galk16, rpsL1 (Str<sup>R</sup>), hsdR2, mcrA1, mcrB1</i>                                                                                                              | Euromedex  |                        |
| <i>BL21 (DE3)</i>                       | <i>F-, ompT gal dcm lon hsdS<sub>B</sub>(r<sub>B</sub><sup>-</sup>m<sub>B</sub><sup>-</sup>) λ(DE3 [lacI lacUV5-T7 gene 1 ind1 sam7 nin5])</i>                                                        | 3          |                        |
| <i>BL21 star (DE3)</i>                  | <i>F<sup>-</sup> ompT gal dcm lon hsdS<sub>B</sub>(r<sub>B</sub><sup>-</sup>m<sub>B</sub><sup>-</sup>) λ(DE3 [lacI lacUV5-T7p07 ind1 sam7 nin5]) [malB<sup>+</sup>]<sub>K-12</sub>(λ<sup>S</sup>)</i> | Invitrogen |                        |
| <b>Plasmids</b>                         |                                                                                                                                                                                                       |            |                        |
| <i>pETPhos-copD (extra)</i>             | <i>pETPhos derivative, encoding CopD, from Met38 to Leu162, Amp<sup>R</sup></i>                                                                                                                       | This study | 37, 38                 |
| <i>pETPhos-PBP2b (extra)</i>            | <i>pETPhos derivative, encoding PBP2b, from Met39 to Asn685, Amp<sup>R</sup></i>                                                                                                                      | This study | 39, 40                 |
| <i>pETPhos-PBP1a (extra)</i>            | <i>pETPhos derivative, encoding PBP1a, from Ser37 to Pro719, Amp<sup>R</sup></i>                                                                                                                      | This study | 41, 42                 |
| <i>pKT25</i>                            | <i>P<sub>lac</sub>-T25- kan pACYC ori</i>                                                                                                                                                             | 4          |                        |
| <i>pUT18C</i>                           | <i>P<sub>lac</sub>-T18-, bla</i>                                                                                                                                                                      | 4          |                        |
| <i>pKT25-zip</i>                        | <i>P<sub>lac</sub>-T25-leucine zipper region from yeast GCN4. kan pACYC ori</i>                                                                                                                       | 4          |                        |
| <i>pUT18C-zip</i>                       | <i>P<sub>lac</sub>-T18-leucine zipper region from yeast GCN4. bla</i>                                                                                                                                 | 4          |                        |
| <i>PUT18C-pbp2b</i>                     | <i>P<sub>lac</sub>-T18-PBP2b bla pUC ori</i>                                                                                                                                                          | 5          |                        |
| <i>PUT18C-pbp2x</i>                     | <i>P<sub>lac</sub>-T18-PBP2x bla pUC ori</i>                                                                                                                                                          | This study | 43, 44                 |
| <i>PUT18C-PBP2x/PBP2bT M-CD</i>         | <i>P<sub>lac</sub>-T18-PBP2b(Met1-Tyr38)-PBP2x(Thr52-Asp750) bla pUC ori</i>                                                                                                                          | This study | 45, 46, 48, 49         |
| <i>PUT18C-PBP2b/PBP2xT M-CD</i>         | <i>P<sub>lac</sub>-T18-PBP2x(Met1-Gly51)-PBP2b(Met39-Asn685) bla pUC ori</i>                                                                                                                          | This study | 47, 48, 49, 50         |
| <i>PUT18C-pbp1a</i>                     | <i>P<sub>lac</sub>-T18-PBP1a bla pUC ori</i>                                                                                                                                                          | 6          |                        |
| <i>PUT18C-pbp2a</i>                     | <i>P<sub>lac</sub>-T18-PBP2a bla pUC ori</i>                                                                                                                                                          | 6          |                        |
| <i>PUT18C-PBP2a/PBP1aT M-CD</i>         | <i>P<sub>lac</sub>-T18-PBP1a(Met1-Ser37)-PBP2a(Ser79-Arg731) bla pUC ori</i>                                                                                                                          | This study | 51, 52, 53, 54         |



|                                 |                                                                              |            |                |
|---------------------------------|------------------------------------------------------------------------------|------------|----------------|
|                                 |                                                                              |            |                |
| <i>PUT18C-PBP1α/PBP2aT M-CD</i> | <i>P<sub>lac</sub>-T18-PBP2a(Met1-Lys78)-PBP1α(Lys38-Pro719) bla pUC ori</i> | This study | 48, 55, 56, 57 |
| <i>pKT25-copD</i>               | <i>P<sub>lac</sub>-T25-copD kan pACYC ori</i>                                | This study | 57, 58, 59, 60 |

## References

- 1 – Mercy C, Ducret A, Slager J, Lavergne J.P, Fretton C, Narayanan Nagarajan S, Garcia P, Noiro-Gros M.F, Dubarry N, Nourikyan J, Veening J.W, Grangeasse C. RocS drives chromosome segregation and nucleoid occlusion in *Streptococcus pneumoniae*. *Nature Microbiology* 4: 1661-1670 (2019).
- 2 - Bullock, W. O., Fernandez, J. M. & short, J. M. A high efficiency plasmid transforming *recA Escherichia coli* strain with beta-galactosidase selection. *Biotechniques* 5, 376 (1987).
- 3 - Studier, F. W. & Moffatt, B. A. Use of bacteriophage T7 RNA polymerase to direct selective high-level expression of cloned genes. *J Mol Biol* 189, 113-130 (1986).
- 4 - Karimova G, Ullmann A, Ladant D. Protein-Protein Interaction Between *Bacillus stearotherophilus* Tyrosyl-tRNA Synthetase Subdomains Revealed by a Bacterial Two-Hybrid System. *J Mol Microbiol Biotechnol* 3(1):73–82 (2001).
- 5 - Straume, Stamsås, Berg, Salehian, Håvarstein. Identification of pneumococcal proteins that are functionally linked to penicillin-binding protein 2b (PBP2b). *Molecular Microbiology* (2017) 103(1), 99–116 (2016).
- 6 - Fenton AK, Mortaji LE, Lau DTC, Rudner DZ, Bernhardt TG. CozE is a member of the MreCD complex that directs cell elongation in *Streptococcus pneumoniae*. *Nature Microbiology* 2(0):1–9 (2016).

**Table S2 - List of primers**

| Number | Name                                         | Sequence 5'-3'                                     |
|--------|----------------------------------------------|----------------------------------------------------|
| 1      | Upstream of <i>copD</i> (-635) (+)           | CACTGTACCAGGGATAGAGAAG                             |
| 2      | Downstream of <i>copD</i> (+1134) (-)        | CACCATTGATGACCACTGTTTGC                            |
| 3      | Janus cassette (+)                           | CCGTTTGATTTTTAATGGATAATG                           |
| 4      | Janus cassette (-)                           | AGAGACCTGGGCCCTTTCC                                |
| 5      | Janus / Upstream of <i>copD</i> (-1) (-)     | CATTATCCATTA AAAATCAAACGGCCCT<br>AGACCATACTGCCACAG |
| 6      | Janus / Downstream of <i>copD</i> (+488) (+) | GGAAAGGGGCCAGGTCTCTGGTCAAT<br>AAGGAGGGCCTATG       |
| 7      | Upstream of <i>copD</i> (-1) (-)             | CCCTAGACCATACTGCCACAG                              |
| 8      | Downstream of <i>copD</i> (+411) (+)         | CTGTGGCAGTATGGTCTAGGGGGTCAA<br>TAAGGAGGGCCTATG     |
| 9      | <i>copD-ΔPepSY</i> (+)                       | AACTATCCAACCGTGTT                                  |
| 10     | <i>copD-ΔPepSY</i> (-)                       | ACACGGTTGGATAGTTTCAATACTGCTG<br>AGCT               |
| 11     | Linker / <i>copD</i> (+429) (-)              | CTGCAGGAACCTCGATGTCTAGTTTTAGG<br>CCCTCCTATTGACC    |

|    |                                                              |                                                                       |
|----|--------------------------------------------------------------|-----------------------------------------------------------------------|
| 12 | <i>sfGfp</i> (-)                                             | TTATTTGTAGAGCTCATCCATGCCG                                             |
| 13 | <i>copD</i> / <i>sfGfp</i> (+)                               | CGGCATGGATGAGCTCTACAAATAAGG<br>TCAATAAGGAGGGCCTATG                    |
| 14 | <i>cpsN</i> (+308) (+)                                       | CATCGGAACCTATACTCTTTTAG                                               |
| 15 | <i>cpsO</i> (+800) (-)                                       | ATAACAAATCCAGTAGCTTTGG                                                |
| 16 | $P_{comX}$ (0) (+)                                           | TGAACCTCCAATAATAAATAAATAAAT                                           |
| 17 | <i>cpsN</i> /0 (+1106) (+)                                   | TTTCTAATATGTAACCTCTCCCAAT                                             |
| 18 | <i>cpsN</i> / <i>copD</i> (-)                                | ATTGGGAAGAGTTACATATTAGAAATCA<br>TAGGCCCTCCTTATTGAC                    |
| 19 | $P_{comX}$ / <i>copD</i> (+)                                 | ATTTATATTTATTATTGGAGGTTCAATGA<br>AAAAAAGACAAAACAAAGCAAAAAATA<br>ATC   |
| 20 | $P_{comX}$ / <i>sfGfp</i> (+)                                | TATTTATTATTGGAGGTTCAATGTCTAAA<br>GGTGAAGAGTT                          |
| 21 | <i>cpsN</i> / <i>sfGfp</i> (-)                               | GAAGAGTTACATATTAGAAATTATTTGT<br>ACAATTCATCCA                          |
| 22 | Upstream of <i>PBP2b</i> (-658) (+)                          | GCCGCTTGGTCTGTCAAAGCTTC                                               |
| 23 | Downstream of <i>PBP2b</i> (+2725) (-)                       | CACTATACAAAAGAGGCCGATAGG                                              |
| 24 | <i>gfp</i> / linker (-)                                      | TCCGGATCCCTCGAGTTTATACAATTCAT<br>CCATACCATGTG                         |
| 25 | Linker / <i>PBP2b</i> (+)                                    | CTCGAGGGATCCGGAATGAGACTGATT<br>TGTATGA                                |
| 26 | Upstream of <i>PBP2b</i> / <i>gfp</i> (+)                    | AGATTTTAAGTTAGAAATGATTTCTAAA<br>GGTG                                  |
| 27 | <i>rfp</i> / linker (-)                                      | TCCGGATCCCTCGAGCAATTTACTAGGC<br>AAAT                                  |
| 28 | Upstream of <i>PBP2b</i> / <i>rfp</i> (+)                    | AGATTTTAAGTTAGAAATGAAACATCTT<br>ACCG                                  |
| 29 | $P_{comX}$ / <i>ezrA</i> (+)                                 | ATTTATATTTATTATTGGAGGTTCAATGT<br>CTAATGGACAATAATTTATTTAATGG           |
| 30 | <i>cpsN</i> / <i>ezrA</i> (-)                                | ATTGGGAAGAGTTACATATTAGAAATTA<br>AAAACGAATCGTTTCACGTGTTTTTC            |
| 31 | Upstream of <i>ezrA</i> (-587) (+)                           | CAGCCATGGGAACAGGATTTG                                                 |
| 32 | Downstream of <i>ezrA</i> (+2338) (-)                        | TTTATGATATTTAGCTGTACGAGAGTC                                           |
| 33 | Upstream of Janus / <i>ezrA</i> (-)                          | CATTATCCATTAATAAATCAAACGGTTAA<br>AAACGAATCGTTTCACGTGTTTTTC            |
| 34 | Downstream of <i>ezrA</i> / Janus (+)                        | GGAAAGGGGCCAGGTCTCTTAAAAGA<br>AAAAGATTTTATTGTGTGAGG                   |
| 35 | Downstream of <i>erzA</i> (+)                                | CGATTGTTTCAAGTAAAAAAGGAGTTTG<br>ATTAAGAAAAAGATTTTATTGTGTGA<br>GGAGC   |
| 36 | Upstream of <i>ezrA</i> (-)                                  | GCTCCTCACACAATAAAATCTTTTTCTTT<br>TAATCAAACCTCTTTTTTACTTGAAACAA<br>TCG |
| 37 | Extracellular domain of <i>copD</i> with BamHI extension (-) | TATGGATCCTCATAGGCCCTCCTTATTGA<br>CC                                   |
| 38 | Extracellular domain of <i>copD</i> with NdeI extension (+)  | TATCATATGAAACCTATCAAACAGCTA<br>AAAG                                   |
| 39 | <i>PBP2b</i> with BamHI extension (-)                        | TATGGATCCCTAATTCATTGGATGGTAT<br>TTTTGATACAG                           |

|    |                                                            |                                                  |
|----|------------------------------------------------------------|--------------------------------------------------|
| 40 | <i>PBP2b</i> with NdeI extension (+)                       | GGGAATCCATATGCAGGTTTTGAACAA<br>GGATTTTTACG       |
| 41 | <i>PBP1a</i> with BamH1 extension (-)                      | TATGGATCCTTATGGTTGTGCTGGTTGA<br>G                |
| 42 | <i>PBP1a</i> with NdeI extension (+)                       | GGGAATCCATATGAGCAAGGCTCCTA<br>GCCTATCCG          |
| 43 | <i>PBP2x</i> with Acc65I extension (-)                     | TATGGTACCCGTTAGTCTCCTAAAGTTA<br>ATGTAATTTTTTAATG |
| 44 | <i>PBP2x</i> with XbaI extension (+)                       | TATTCTAGAGATGAAGTGGACAAAAG<br>AGTAATC            |
| 45 | <i>PBP2b</i> (M1-Y38) fused to <i>PBP2x</i> (T52-D750) (+) | TTGGTCGTTTGTGTATACTCGCTTTGGA<br>ACAGA            |
| 46 | <i>PBP2b</i> (M1-Y38) fused to <i>PBP2x</i> (T52-D750) (-) | TCTGTTCCAAAGCGAGTATACAACAAAC<br>GACCAA           |
| 47 | pKNT25/pUT18/pUT18C-GIBSON-XbaI (-)                        | CTCTAGAGTCGACCTGCAG                              |
| 48 | pKNT25/pUT18 (+)                                           | GTATGTTGTGTGGAATTGTGAGCGG                        |
| 49 | <i>PBP2x</i> (M1-M51) fused to <i>PBP2b</i> (M39-N685) (+) | TCATTATTGGGACAGGCATGCAGGTTTT<br>GAACAA           |
| 50 | <i>PBP2x</i> (M1-M51) fused to <i>PBP2b</i> (M39-N685) (-) | TTGTTCAAACCTGCATGCCTGTCCCAAT<br>AATGA            |
| 51 | <i>PBP1a</i> (M1-S37) fused to <i>PBP2a</i> (S79-R731) (+) | TTTTCTACTACGTTAGCTCGACCAATGTC<br>AATGA           |
| 52 | <i>PBP1a</i> (M1-S37) fused to <i>PBP2a</i> (S79-R731) (-) | TCATTGACATTGGTCGAGCTAACGTAGT<br>AGAAAA           |
| 53 | pUT18C (-)                                                 | TCGGGGCTGGCTTAACTA                               |
| 54 | pKNT25/pUT18C/pUT18 (+)                                    | GTACCGAGCTCGAATTCA                               |
| 55 | <i>PBP2a</i> (M1-L78) fused to <i>PBP1a</i> (S38-P719) (+) | TGTTTGCTGTAGCCAAGAAGGCTCCTAG<br>CCTATC           |
| 56 | <i>PBP2a</i> (M1-L78) fused to <i>PBP1a</i> (L38-P719) (-) | GATAGGCTAGGAGCCTTCTTGGCTACAG<br>CAAACA           |
| 57 | pKT25-GIBSON-XbaI (-)                                      | CTCTAGAGTCGACCCTGCAG                             |
| 58 | pKT25-GIBSON-Acc65I (+)                                    | CGGGTACCTAAGTAACTAAGAATTC                        |
| 59 | <i>copD</i> with XbaI extension (-)                        | AGGGTCGACTCTAGAGGTGAAAAAAG<br>ACAAA              |
| 60 | <i>copD</i> with Acc65I extension (-)                      | TATGGTACCCGTAGGCCCTCCTTATTGA<br>CCAATG           |
